# Supplementary material
Source: publisher figshare collection journal article supplement (https://karger.figshare.com/ndownloader/files/37549654)
Supplement: Supplementary file 1 [file 37549654]

**Inhibition of** **Phosphoinositide 3-Kinase Gamma protects endothelial cells via the Akt signaling pathway in sepsis-induced acute kidney injury**

Han Li1, Jun-Xian Xu2, Tiao-Chun Cheng1, Li-Jun Tian2,Jin-Feng Lin2, Xi Luo3, Zhao-Lian Bian4, Xu-Dong Han2, *

**Supplementary Figure 1**

Inhibition of PI3Kγ improves sepsis-associated AKI. The mRNA expression of kidney damage markers KIM-1 and NGAL in kidney tissues of normal control (NC, n = 10), mice in sepsis (n = 12) and CZC group (n = 12). **p* < 0.05; ***p* < 0.01.
